# Supplementary material for: A natural pyrazolotriazine pseudoiodinine produced by Pseudomonas mosselii 923 inhibits bacterial and fungal rice pathogens
Source: Research Square preprint supplement (doi:10.21203/rs.3.rs-1750568/v1), 2022-06-24
Supplement: Supplementary file 1 [file c6063b4763ddda833138a72f.xlsx]

## Sheet: Supplementary Table 1
Supplementary Table 1. Strains and plasmids used in the current study.
Strains and plasmids	Characteristics	Source
Strains
Escherichia coli
DH5α	F-, endA1, thi-1, recA1, Φ80lacZ, Δ M15	This lab
EC100D	Electrocompetent cells, pir+	This lab
BL21	F- ompT hsdSB (rB-mB-) gal dcm met (DE3)	This lab
Pseudomonas mosselii
923	Wild-type, isolated from rice rhizosphere, Spr	This study
DSM17497	Type strain of P. mosselii	CCTCCa
34-6	Derived from strain 923; contains Tn5 insertion in gacA; defective in pseudoiodinine synthesis, Kmr	This study
P. putida KT2440	Wild-type strain KT2440	Shuangjun Lin’s labb
Magnaporthe oryzae R01-1	Causes rice blast	Jiangbo Fan’s labb
Xanthomonas oryzae pv. oryzicola (Xoc)
RS105	Dominant strain causing BLS in China, contains over 20 tale genes, Chinese race 2, Rifr	1
RS105-Gus	RS105 carrying the reporter vector pHG1-hrcC, Spr	This lab
YNB01-3	Xoc strain isolated from Yunnan province, China	This lab
RSGD10	Xoc strain isolated from Jiangsu province, China	This lab
ZJB01-25	Xoc strain isolated from Zhejiang province, China	This lab
HNB3-17	Xoc strain isolated from Hunan province, China	This lab
RS85	Xoc strain isolated from Jiangsu province, China	This lab
HNB8-47	Xoc strain isolated from Hunan province, China	This lab
HANB1-19	Xoc strain isolated from Hainan province, China	This lab
JSB1-39	Xoc strain isolated from Jiangsu province, China	This lab
AHB1-58	Xoc strain isolated from Anhui province, China	This lab
HANB12-26	Xoc strain isolated from Hainan province, China	This lab
YNB0-17	Hypovirulent isolate from Yunnan province; contains nine tale genes	2
Xanthomonas oryzae pv. oryzae (Xoo)
PXO99A	Xoo wild-type strain，Philippine race 6	3
YC18	Xoo strain isolated from Yinchuan city, China	This lab
XZ35	Xoo strain isolated from Xizang, China	This lab
LYG46	Xoo strain isolated from Jiangsu province, China	This lab
8569	Xoo strain isolated from Yinchuan city, China	This lab
JL1	Xoo strain isolated from Jilin province, China	This lab
JL4	Xoo strain isolated from Jilin province, China	This lab
JL3	Xoo strain isolated from Jilin province, China	This lab
AH1	Xoo strain isolated from Anhui province, China	This lab
YC2	Xoo strain isolated from Yinchuan city, China	This lab
YC11	Xoo strain isolated from Yinchuan city, China	This lab
YC7	Xoo strain isolated from Yinchuan city, China	This lab
Xanthomonas spp.
X. campestris pv. phaseoli ICMP5834	Causes bacterial blight of bean	ICMPc
X. axonopodis pv. glycines ICMP5732	Causes bacterial pustule on soybean	ICMP
X. campestris pv. vesicatoria NCPPB701	Causes pepper spot disease	NCPPBd
X. campestris pv. malvacearum ATCC12131	Causes bacterial angular leaf spot on cotton	ATCCe
X. arboricola pv. juglandis DW3F3	Causes black spot of walnut	This lab
X. axonopodis pv. vignicola ATCC11648	Causes cowpea blight	ATCC
X. axonopodis pv. allii LMG578	Causes bacterial blight of onion	This lab
X. campestris pv. musacearum ICMP287	Causes banana bacterial wilt	ICMP
X. translucens pv. cerealis NXtc01	Causes bacterial leaf streak on true grasses	This lab
X. citri subsp. citri 029-1	Causes citrus canker	This lab
X. campestris pv. campestris 8004-WT	Causes black rot disease in cruciferous crops	Yawen He’s labb
P. mosselii deletion mutants
ΔgacA	gacA deletion mutant of 923, Spr	This study
Δorf2059	orf2059 deletion mutant of 923, Spr	This study
Δorf2060	orf2060 deletion mutant of 923, Spr	This study
Δorf2061	orf2061 deletion mutant of 923, Spr	This study
Δorf2062	orf2062 deletion mutant of 923, Spr	This study
Δorf2063	orf2063 deletion mutant of 923, Spr	This study
Δorf2064	orf2064 (psdA) deletion mutant of 923, Spr	This study
Δorf2065	orf2065 (psdB) deletion mutant of 923, Spr	This study
Δorf2066	orf2066 (psdC) deletion mutant of 923, Spr	This study
Δorf2067	orf2067 (psdD) deletion mutant of 923, Spr	This study
Δorf2068	orf2068 (psdE) deletion mutant of 923, Spr	This study
Δorf2069	orf2069 (psdF) deletion mutant of 923, Spr	This study
Δorf2070	orf2070 (psdG) deletion mutant of 923, Spr	This study
Δorf2071	orf2071 deletion mutant of 923, Spr	This study
Δorf2072	orf2072 deletion mutant of 923, Spr	This study
Δorf2073	orf2073 deletion mutant of 923, Spr	This study
Δorf2074	orf2074 deletion mutant of 923, Spr	This study
Δorf2075	orf2075 deletion mutant of 923, Spr	This study
Δorf2076	orf2076 deletion mutant of 923, Spr	This study
Δorf2077	orf2077 deletion mutant of 923, Spr	This study
ΔrsmY	rsmY deletion mutant of 923, Spr	This study
ΔrsmZ	rsmZ deletion mutant of 923, Spr	This study
ΔrsmYZ	rsmYZ double deletion mutant of 923, Spr	This study
ΔcsrA1	csrA1 deletion mutant of 923, Spr	This study
ΔcsrA2	csrA2 deletion mutant of 923, Spr	This study
ΔcsrA3	csrA3 deletion mutant of 923, Spr	This study
ΔcsrA1A2	csrA1A2 double deletion mutant of 923, Spr	This study
ΔcsrA1A3	csrA1A3 double deletion mutant of 923, Spr	This study
ΔcsrA2A3	csrA2A3 double deletion mutant of 923, Spr	This study
ΔcsrA1A2A3	csrA1A2A3 triple deletion mutant of 923, Spr	This study
Complemented strains of P. mosselii 923
CΔgacA	ΔgacA containing pUFR-gacA, Kmr	This study
CΔpsdA	Δorf2064 (DpsdA) containing pBS-psdA, Gmr	This study
CΔpsdB	Δorf2065 (DpsdB) containing pBS-psdB, Gmr	This study
CΔpsdC	Δorf2066 (DpsdC) containing pBS-psdC, Gmr	This study
CΔpsdD	Δorf2067 (DpsdD) containing pBS-psdD, Gmr	This study
CΔpsdE	Δorf2068 (DpsdE) containing pBS-psdE, Gmr	This study
CΔpsdF	Δorf2069 (DpsdF) containing pBS-psdF, Gmr	This study
CΔpsdG	Δorf2070 (DpsdG) containing pBS-psdG, Gmr	This study
CΔrsmY	ΔrsmYZ containing pUFR-rsmY, Kmr	This study
CΔrsmZ	ΔrsmYZ containing pUFR-rsmZ, Kmr	This study
CΔrsmYZ	ΔrsmYZ containing pUFR-rsmYZ, Kmr	This study
PsdB-comp.1	923 containing pBS-DSM17497-Pseu in DpsdB, Gmr	This study
PsdB-comp.2	924 containing pBS-DSM17497-Pseu in DpsdB, Gmr	This study
PsdC-comp.1	925 containing pBS-DSM17497-Pseu in DpsdC, Gmr	This study
PsdC-comp.2	926 containing pBS-DSM17497-Pseu in DpsdC, Gmr	This study
PsdG-comp.1	927 containing pBS-DSM17497-Pseu in DpsdG, Gmr	This study
PsdG-comp.2	928 containing pBS-DSM17497-Pseu in DpsdG, Gmr	This study
P. mosselii 923 overexpressing strains
923 pUFR-gacA	P. mosselii 923 containing pUFR-gacA, Kmr	This study
ΔcsrA1A2A3-pBSPPc-ABCDEFG	P. mosselii ΔcsrA1A2A3 containing pBSPPc-ABCDEFG, Gmr	This study
Plasmids
pET28a	6x His tag, Kmr	This lab
EZ-Tn5 <R6Kγori/KAN-2>	Contains Tn5 transposon, Kmr	Epicentre
pUFR034	Cloning vector with lacZa promoter, Kmr	This lab
p2P24Km	Suicide vector with sacB used for homologous recombination in Pseudomonas spp., Kmr	4
p24-gacA	Suicide vector containing gacA flanking sequences in p2P24Km as an XbaI/KpnI fragment, Kmr	This study
pUFR-gacA	gacA cloned in pUFR034 as an EcoRI/KpnI fragment, Kmr	This study
p24-orf 2059	Up and down fragments of orf2059 cloned in p2P24 as a XbaI/EcoRI fragment, Kmr	This study
p24-orf 2060	Up and down fragments of orf2060 cloned in p2P24 as a XbaI/EcoRI fragment, Kmr	This study
p24-orf 2061	Up and down fragments of orf2061 cloned in p2P24 as a XbaI/EcoRI fragment, Kmr	This study
p24-orf 2062	Up and down fragments of orf2062 cloned in p2P24 as a XbaI/EcoRI fragment, Kmr	This study
p24-orf 2063	Up and down fragments of orf2063 cloned in p2P24 as a XbaI/EcoRI fragment, Kmr	This study
p24-orf 2064	Up and down fragments of orf2064 cloned in p2P24 as a XbaI/EcoRI fragment, Kmr	This study
p24-orf 2065	Up and down fragments of orf2065 cloned in p2P24 as a XbaI/EcoRI fragment, Kmr	This study
p24-orf 2066	Up and down fragments of orf2066 cloned in p2P24 as a XbaI/EcoRI fragment, Kmr	This study
p24-orf 2067	Up and down fragments of orf20697cloned in p2P24 as a XbaI/EcoRI fragment, Kmr	This study
p24-orf 2068	Up and down fragments of orf2068 cloned in p2P24 as a XbaI/EcoRI fragment, Kmr	This study
p24-orf 2069	Up and down fragments of orf2069 cloned in p2P24 as a XbaI/EcoRI fragment, Kmr	This study
p24-orf 2070	Up and down fragments of orf2070 cloned in p2P24 as a XbaI/EcoRI fragment, Kmr	This study
p24-orf 2071	Up and down fragments of orf2071 cloned in p2P24 as a XbaI/EcoRI fragment, Kmr	This study
p24-orf 2072	Up and down fragments of orf2072 cloned in p2P24 as a XbaI/KpnI fragment, Kmr	This study
p24-orf 2073	Up and down fragments of orf2073 cloned in p2P24 as a XbaI/KpnI fragment, Kmr	This study
p24-orf 2074	Up and down fragments of orf2074 cloned in p2P24 as a XbaI/KpnI fragment, Kmr	This study
p24-orf 2075	Up and down fragments of orf2075 cloned in p2P24 as a XbaI/KpnI fragment, Kmr	This study
p24-orf 2076	Up and down fragments of orf2076 cloned in p2P24 as a XbaI/EcoRI fragment, Kmr	This study
p24-orf 2077	Up and down fragments of orf2077 cloned in p2P24 as a XbaI/EcoRI fragment, Kmr	This study
p24-rsmY	Up and down fragments of rsmY cloned in p2P24 as a XbaI/KpnI fragment, Kmr	This study
p24-rsmZ	Up and down fragments of rsmZ cloned in p2P24 as a XbaI/KpnI fragment, Kmr	This study
p24-csrA1	Up and down fragments of csrA1 cloned in p2P24 as a XbaI/EcoRI fragment, Kmr	This study
p24-csrA2	Up and down fragments of csrA1 cloned in p2P24 as a XbaI/EcoRI fragment, Kmr	This study
p24-csrA3	Up and down fragments of csrA3 cloned in p2P24 as a XbaI/KpnI fragment, Kmr	This study
pBS-psdA	psdA with its native promoter cloned in pBSPPc as a SalI/BamHI fragment, Gmr	This study
pBS-psdB	psdB with psdA promoter cloned in pBSPPc as a SalI/BamHI fragment, Gmr	This study
pBS-psdC	psdC with psdA promoter cloned in pBSPPc as a SalI/BamHI fragment, Gmr	This study
pBS-psdD	psdD with psdA promoter cloned in pBSPPc as a SalI/BamHI fragment, Gmr	This study
pBS-psdE	psdE with psdA promoter cloned in pBSPPc as a SalI/BamHI fragment, Gmr	This study
pBS-psdF	psdF with psdA promoter cloned in pBSPPc as a SalI/BamHI fragment, Gmr	This study
pBS-psdG	psdG with psdA promoter cloned in pBSPPc as a SalI/BamHI fragment, Gmr	This study
pET28-gacA	gacA in pET28a as a XhoI/NdeI fragment, Kmr	This study
pET28-gacA-BL21	BL21 containing pET28-gacA, Kmr	This study
pNG1	Contains multi-cloning site (MCS), RBS, and uidA as a HindIII fragment; Kmr	This lab
pUFR-rsmY	rsmY in pUFR034 as an EcoRI/KpnI fragment, Kmr	This study
pUFR-rsmZ	rsmZ in pUFR034 as an EcoRI/KpnI fragment, Kmr	This study
pUFR-rsmYZ	rsmYZ in pUFR034 as an EcoRI/KpnI fragment, Kmr	This study
pBSPPc	oriT+ replacement vector derived from pBR322, Apr, Gmr	Shuangjun Lin’s labb
pBSPPc-Pseu-ORF	Pseudoiodinine gene cluster psdABCDEFG without psdA promoter cloned in pBSPPc as an EcoRI/ BamHI fragment, Gmr	This study
pBS-DSM17497-Pseu	Contains pseudoiodinine gene cluster (orf2184-2190) from P. mosselii DSM17497 in pBSPPc as a XbaI/BamHI fragment, Gm r	This study
pNG1-P2064	Contains transcriptional fusion of psdA promoter (orf2064) with uidA in pNG1 as an EcoRI/KpnI fragment	This study
pNG1-P2064-post	Contains translational fusion of psdA promoter (orf2064) and uidA in pNG1 as an EcoRI/NdeI fragment	This study
923-pNG1-P2064	Fusion of pNG1-P2064 in 923, Kmr	This study
923-pNG1-P2064-post	Fusion of pNG1-P2064-post in 923, Kmr	This study
ΔcsrA1-pNG1-P2064-post	Fusion of pNG1-P2064-post in ΔcsrA1, Kmr	This study
ΔcsrA2-pNG1-P2064-post	Fusion of pNG1-P2064-post in ΔcsrA2, Kmr	This study
ΔcsrA3-pNG1-P2064-post	Fusion of pNG1-P2064-post in ΔcsrA3, Kmr	This study
ΔcsrA1A2A3 -pNG1-P2064	Fusion of pNG1-P2064 in ΔcsrA1A2A3, Kmr	This study
ΔcsrA1A2A3-pNG1-P2064-post	Fusion of pNG1-P2064-post in ΔcsrA1A2A3, Kmr	This study
pBSPPc-ABCDEFG	Pseudoiodinine synthesis gene cluster orf2064-orf 2070 (psdABCDEFG) and the orf2064 (psdA) promoter in pBSPPc as a XbaI/BamHI fragment, Gmr	This study
pBSPPc-P2064-RBS-Pseu-ORF	Fusion of 455-bp including orf2064 (psdA) promoter and RBS of pNG1-P2064 in pBSPPc-Pseu-ORF by one step cloning, Gmr	This study
ΔcsrA1A2A3-pBSPPc-P2064-RBS-Pseu-ORF	Fusion of pBSPPc-P2064-RBS-Pseu-ORF in ΔcsrA1A2A3, Gmr	This study
Abbreviations indicate: a CCTCC, China Center for Type Culture Collection; b University of Shanghai Jiao Tong, Shanghai, China; c ICMP, International Collection of Microorganisms from Plants; d NCPPB, National Collection of Plant Pathogenic Bacteria; and e ATCC, American Type Culture Collection. Antibiotics: Km, kanamycin; Gm, gentamicin; Sp, spectinomycin; and Rif, rifampicin.
References 1. Zou, L.-f. et al. Elucidation of the hrp clusters of Xanthomonas oryzae pv. oryzicola that control the hypersensitive response in nonhost tobacco and pathogenicity in susceptible host rice. Applied and environmental microbiology 72, 6212-6224 (2006). 2. Cai, L. et al. A transcription activator-like effector Tal7 of Xanthomonas oryzae pv. oryzicola activates rice gene Os09g29100 to s…

## Sheet: Supplementary Table 2
Supplementary Table 2.Primers used in this study.
Primers	Sequence (5'→3')	Description
Universal Primers
27F	AGAGTTTGATCCTGGCTCAG	Used for amplifying P. mosselii 923 16S rRNA
1492R	TACGGCTACCTTGTTACGACTT
M13-F	CGCCAGGGTTTTCCCAGTCACGAC	Used to verify constructs by sequence analysis
M13-R	GAGCGGATAACAATTTCACACAGG
PNG-F	ACTGCCAGGAATTGGGGATCGGAAG	Used for sequencing pNG1 constructs.
PNG-R	TGGCCTGCCCAACCTTTCGGTATAA
Primers used for one-step cloning
P2064-RBS-F1	CTAAGCGGCCGCTCTAGAACTAGTGGATCCAAACCGGGCGTGAATGAAC	Amplifies a 516-bp fragment of orf2064 (psdA) promoter and RBS site
P2064-RBS-R1	CATAGATGGTCACGGGTTTCTGGGCATTCATATGTTTTTCCTCCTTATAAAGTTAATC
pBS-Pseu-F2	ATGAATGCCCAGAAACCCGTGACC	Amplifies a 11,932-bp fragment of pBSPPc-Pseu-ORF
pBS-Pseu-R2	GGATCCACTAGTTCTAGAGCGG
Primers used for GUS constructs
P2064-F	CGGGGTACCAAACCGGGCGTGAATGAAC (KpnI)	Amplifies 399 bp of the orf2064 (psdA) promoter as a KpnI/EcoRI fragment
P2064-R	CCGGAATTCGCGGTACTGGTCGGAAAG
P2064-F	CGGGGTACCAAACCGGGCGTGAATGAAC (KpnI)
P2064-R	CCGGAATTCGCGGTACTGGTCGGAAAG	Amplifies 399 bp of orf2064 (psdA) promoter as a NdeI/EcoRI fragment
Primers used for constructing deletion mutants
gacA-up-F1	GGAATTCCATATGCAGGACCCTAATCAAGCAGA (NdeI)	Amplifies a 716-bp sequence upstream of gacA
gacA-up-R1	CGGGGTACCACACTTTTCCCGCCGTTTCA (KpnI)
gacA-down-F2	GCTCTAGACGTAGTAACTGTCCTCGCAC (XbaI)	Amplifies a 487-bp sequence downstream of gacA
gacA-down-R2	GGAATTCCATATGGCACACCTCATGTCACAACC (NdeI)
orf 2059-up-F2	GCTCTAGAGGGCCATCTTGATCGCTT (XbaI)	Amplifies a 944-bp upstream homologue arm of orf2059
orf 2059-up-R2	GGAATTCCATATGATGGCGGTAGTTCTCGGC (NdeI)
orf 2059-down-F1	GGAATTCCATATGTATCGCCGTCGGTCTACT (NdeI)	Amplifies a 530-bp downstream homologue arm of orf2059
orf 2059-down-R1	CCGGAATTCGTTCTTCCCGAGCATCAG (EcoRI)
orf 2060-down-F2	GCTCTAGAGTTCAACCATGCCAGACC (XbaI)	Amplifies a 752-bp downstream homologue arm of orf2060
orf 2060-down-R2	GGAATTCCATATGAGTAGACCGACGGCGATA (NdeI)
orf 2060-up-F1	GGAATTCCATATGATGACAGGGTCTCTGGGGT (NdeI)	Amplifies a 883-bp upstream homologue arm of orf2060
orf 2060-up-R1	CCGGAATTCTTTTCCGCTACAGACGCAG (EcoRI)
orf 2061-down-F2	GCTCTAGACAGGTCCAGTTCATAGGCG (XbaI)	Amplifies a 515-bp downstream homologue arm of orf2061
orf 2061-down-R2	GGAATTCCATATGCGAGACCTACCTGAAACGC (NdeI)
orf 2061-up-F1	GGAATTCCATATGCAGCTTCATGTCGTCGTCT (NdeI)	Amplifies a 967-bp upstream homologue arm of orf2061
orf 2061-up-R1	CCGGAATTCGATGAATGTTCGGTAGGACG (EcoRI)
orf 2062-up-F2	GCTCTAGAGCGTCTGTAGCGGAAAGC (XbaI)	Amplifies a 938-bp upstream homologue arm of orf2062
orf 2062-up-R2	GGAATTCCATATGGTTGTGGGTAACGGCCTAG (NdeI)
orf 2062-down-F1	GGAATTCCATATGTGCCAGATCATCAATAACTAC (NdeI)	Amplifies a 742-bp downstream homologue arm of orf2062
orf 2062-down-R1	CCGGAATTCCCAGTTCAAAGAAATGATCGTG (EcoRI)
orf 2063-down-F2	GCTCTAGACAGGTGGTGGTGCTGGTT (XbaI)	Amplifies a 553-bp downstream homologue arm of orf2063
orf 2063-down-R2	GGAATTCCATATGCGCATTTCGCCGAAGTAG (NdeI)
orf 2063-up-F1	GGAATTCCATATGGGTCGAGGTCATGGAGCG (NdeI)	Amplifies a 790-bp upstream homologue arm of orf2063
orf 2063-up-R1	CCGGAATTCGGCATCGTTGAAGGCGTC (EcoRI)
psdA-up-F2	GCTCTAGACAGTGGTTCTCGACGATC (XbaI)	Amplifies a 1044-bp upstream homologue arm of orf2064
psdA-up-R2	GGAATTCCATATGGTCGGCGTGTTCATAGAT (NdeI)
psdA-down-F1	GGAATTCCATATGTGATGCTGCGCTTGTTGG (NdeI)	Amplifies a 843-bp downstream homologue arm of orf2064
psdA-down-R1	CCGGAATTCGAGCTCCATCACGGCCTT (EcoRI)
psdB-up-F2	GCTCTAGACCGCATCTTCCTCAACGC (XbaI)	Amplifies a 837-bp upstream homologue arm of orf2065
psdB-up-R2	GGAATTCCATATGCATCAGGCAGCCCTCCGT (NdeI)
psdB-down-F1	GGAATTCCATATGAGCGCCGAAGTGGAGATG (NdeI)	Amplifies a 547-bp downstream homologue arm of orf2065
psdB-down-R1	CCGGAATTCAAGCGGGCGATACGGAAC (EcoRI)
psdC-up-F2	GCTCTAGACTGATGCTGCGCTTGTTG (XbaI)	Amplifies a 962-bp upstream homologue arm of orf2066
psdC-up-R2	GGAATTCCATATGGCTGTTCATGCGAATACCTG (NdeI)
psdC-down-F1	GGAATTCCATATGTGAGCTGTTCCGTCTTCC (NdeI)	Amplifies a 508-bp downstream homologue arm of orf2066
psdC-down-R1	CCGGAATTCGACCTTCTCCGGGTTGTT (EcoRI)
psdD-up-F2	GCTCTAGAAGCTGGATCGACAAGGAA (XbaI)	Amplifies a 685-bp upstream homologue arm of orf2067
psdD-up-R2	GGAATTCCATATGCTTGTTCATGGAATCAGACC (NdeI)
psdD-down-F1	GGAATTCCATATGTGACTCCAGCGAAAAAGG (NdeI)	Amplifies a 430-bp downstream homologue arm of orf2067
psdD-down-R1	CCGGAATTCCAGACCACCGAGATAACG (EcoRI)
psdE-up-F2	GCTCTAGAGTGGCAGCTTTACCCGTT (XbaI)	Amplifies a 788-bp upstream homologue arm of orf2068
psdE-up-R2	GGAATTCCATATGGCTGATAGGGCCAATGTG (NdeI)
psdE-down-F1	GGAATTCCATATGTGAGGAGCAGCACATGAG (NdeI)	Amplifies a 563-bp downstream homologue arm of orf2068
psdE-down-R1	CCGGAATTCCGTCGGTGAAGAAGTAGC (EcoRI)
psdF-up-F2	GCTCTAGAGCCTGTGCAACTTCCTCCT (XbaI)	Amplifies a 729-bp upstream homologue arm of orf2069
psdF-up-R2	GGAATTCCATATGCTTGCTCATGTGCTGCTCC (NdeI)
psdF-down-F1	GGAATTCCATATGGAAGCCCGCTACCTGTTG (NdeI)	Amplifies a 550-bp downstream homologue arm of orf2069
psdF-down-R1	CCGGAATTCGCCTGCTCGTCGCAATAG (EcoRI)
psdG-up-F2	GCTCTAGAATTTCCTGCCTGACCCAC (XbaI)	Amplifies a 778-bp upstream homologue arm of orf2070
psdG-up-R2	GGAATTCCATATGGGTCGATCGCACTCACGT (NdeI)
psdG-down-F1	GGAATTCCATATGGGGGTTAGTGGATGAGTGGT (NdeI)	Amplifies a 422-bp downstream homologue arm of orf2070
psdG-down-R1	CCGGAATTCCCTATTACCGCTGGGACAAG (EcoRI)
orf 2071-down-F2	GCTCTAGATGTGACCCTGGAACCTTG (XbaI)	Amplifies a 910-bp downstream homologue arm of orf2071
orf 2071-down-R2	GGAATTCCATATGTCGGGGCTTACGCATATC (NdeI)
orf 2071-up-F1	GGAATTCCATATGCGTAGACTTCCTTGGATTCC (NdeI)	Amplifies a 622-bp upstream homologue arm of orf2071
orf 2071-up-R1	CCGGAATTCGTTCGCCATGATGTGCCT (EcoRI)
orf 2072-down-F2	GCTCTAGAGTCCCAGCGGTAATAGGT (XbaI)	Amplifies a 578-bp downstream homologue arm of orf2072
orf 2072-down-R2	GGAATTCCATATGGAGTGCCCATGAAGGAAT (NdeI)
orf 2072-up-F1	GGAATTCCATATGCATGTACGCTCCTTGCGT (NdeI)	Amplifies a 910-bp upstream homologue arm of orf2072
orf 2072-up-R1	CGGGGTACCGAGCGGGGTCAAGAAATG (KpnI)
orf 2073-up-F2	GCTCTAGATCAGCGCATAGCTCAAGG (XbaI)	Amplifies a 540-bp upstream homologue arm of orf2073
orf 2073-up-R2	GGAATTCCATATGGATCATGGATGTCGCTCCTG (NdeI)
orf 2073-down-F1	GGAATTCCATATGGTACGTCTGAAGTAAGGCCA (NdeI)	Amplifies a 872-bp downstream homologue arm of orf2073
orf 2073-down-R1	CGGGGTACCGGCTTTTTCATTGCTGCTAG (KpnI)
orf 2074-up-F2	GCTCTAGAGAGCATTGAGCCAAGGGT (XbaI)	Amplifies a 910-bp upstream homologue arm of orf2074
orf 2074-up-R2	GGAATTCCATATGTTCGCTCATGCCCTGTCTC (NdeI)
orf 2074-down-F1	GGAATTCCATATGTCGAAGAAGTGAACCTGCG (NdeI)	Amplifies a 498-bp downstream homologue arm of orf2074
orf 2074-down-R1	CGGGGTACCGTTCCGGCAATGGCAAAG (KpnI)
orf 2075-up-F2	GCTCTAGACGGCTAGTCTCACTTCAAC (XbaI)	Amplifies a 510-bp upstream homologue arm of orf2075
orf 2075-up-R2	GGAATTCCATATGCTGCCAGTAGGTCTCTTCC (NdeI)
orf 2075-down-F1	GGAATTCCATATGCTTTGCCATTGCCGGAAC (NdeI)	Amplifies a 876-bp downstream homologue arm of orf2075
orf 2075-down-R1	CGGGGTACCATCGGCCTGTCCCTCAAC (KpnI)
orf 2076-down-F2	GCTCTAGAGGCCCTAGGCTGTGCTTT (XbaI)	Amplifies a 442-bp downstream homologue arm of orf2076
orf 2076-down-R2	GGAATTCCATATGGTGATCGACGCGCTGAAC (NdeI)
orf 2076-up-F1	GGAATTCCATATGAGCCCCCATTACTCTCAT (NdeI)	Amplifies a 744-bp upstream homologue arm of orf2076
orf 2076-up-R1	CCGGAATTCGCTGTGGGAGTCCAATAC (EcoRI)
orf 2077-down-F2	GCTCTAGACAGGTGGTCGTCGAGGCT (XbaI)	Amplifies a 460-bp downstream homologue arm of orf2077
orf 2077-down-R2	GGAATTCCATATGGAGGCCTATCATGAGCGC (NdeI)
orf 2077-up-F1	GGAATTCCATATGCCCAGGATCTTCAGCATG (NdeI)	Amplifies a 914-bp upstream homologue arm of orf2077
orf 2077-up-R1	CCGGAATTCTGAGCAAGACCTACACCG (EcoRI)
rsmY-up-F1	GGAATTCCATATGTTAGAACTGCGCGGCGTC (NdeI)	Amplifies a 696-bp upstream homologue arm of rsmY
rsmY-up-R1	GGAATTCCATATGTTAGAACTGCGCGGCGTC (KpnI)
rsmY-down-F2	GCTCTAGACTGGTGGTGCAGATCTATGA (XbaI)	Amplifies a 567-bp downstream homologue arm of rsmY
rsmY-down-R2	GGAATTCCATATGTCAGCCGAGCACATCCAAT (NdeI)
rsmZ-up-F1	GGAATTCCATATGCTACTGGAACAGCGACTCG (NdeI)	Amplifies a 828-bp upstream homologue arm of rsmZ
rsmZ-up-R1	CGGGGTACCCTTGATGCCACTCAGCTCT (KpnI)
rsmZ-down-F2	GCTCTAGACGCGACAACATGCCTCAC (XbaI)	Amplifies a 614-bp downstream homologue arm of rsmZ
rsmZ-down-R2	GGAATTCCATATGTCAGCGCTCCAGATCGGC (NdeI)
csrA1-up-F2	GCTCTAGAGTGGTCAAGGGCTGCAAG (XbaI)	Amplifies a 601-bp upstream homologue arm of csrA1
csrA1-up-R2	CGCGGATCCGTTCCGATCCTCCAGCTC (BamHI)
csrA1-down-F1	CGCGGATCCGGGCCCGCTACTCGAACA (BamHI)	Amplifies a 710-bp downstream homologue arm of csrA1
csrA1-down-R1	CCGGAATTCCGTGGCCATGCAGGATTC (EcoRI)
csrA2-up-F1	CGCGGATCCGTAATTCTCCTTGGTGATGTAG (BamHI)	Amplifies a 657- bp upstream homologue arm of csrA2
csrA2-up-R1	CCGGAATTCCAAGCCTTGTTCCAGTACCT (EcoRI)
csrA2-down-F2	GCTCTAGATCAAGGTGCGTGACAGCG (XbaI)	Amplifies a 577-bp downstream homologue arm of csrA2
csrA2-down-R2	CGCGGATCCCCCCAAACCAACCGCATC (BamHI)
csrA3-up-F1	CGCGGATCCAGTTTTCTCCTCACATGAATCTT (BamHI)	Amplifies a 688-bp upstream homologue arm of csrA3
csrA3-up-R1	CCGGAATTCCATTACCATCGATGAAGAGG (EcoRI)
csrA3-down-F2	GCTCTAGAGGGCTTCTTGATGTATGGC (XbaI)	Amplifies a 720-bp downstream homologue arm of csrA3
csrA3-down-R2	CGCGGATCCGGTTGCAAACGAGGAAGG (BamHI)
csrA1-F	TGCGTCGGGTGGATTCTT	Detects the deletion strain of ΔcsrA1
csrA1-R	AGCGCACCCATATCGACA
csrA2-F	TGCTGACCTGGGAGATGC	Detects the deletion strain of ΔcsrA2
csrA2-R	CCGAGGTCAACCAGTTTC
csrA3-F	CAGGGACCTCCTACAGAACA	Detects the deletion strain of ΔcsrA3
csrA3-R	CCAAGGAGAGCATCAACATC
Primers used for gene complementation and overexpression
gacA-com-F	CCGGAATTCGCGACTCAGAGAAGAGCG (EcoRI)	Amplifies a 1074-bp fragment of gacA and promoter
gacA-com-R	CGGGGTACCTTACAGACTTGCGTCGACC (KpnI)
psdA-com-F	GAACCCGTCTCGAGGTCGACAAACCGGGCGTGAATGAA (SalI)	Amplifies a 1344-bp fragment of psdA and promoter
psdA-com-R	GCTCTAGAACTAGTGGATCCTCAGGCAGCCCTCCGTCC (BamHI)
psdB1-com-F	GAACCCGTCTCGAGGTCGACAAACCGGGCGTGAATGAA (SalI)	Amplifies a 300-bp fragment of psdA promoter
psdB1-com-R	CCAACAAGCGCAGCATGCACTCACATCCCTGT
psdB2-com-F	ACAGGGATGTGAGTGCATGCTGCGCTTGTTGG	Amplifies a 925-bp fragment of psdB
psdB2-com-R	GCTCTAGAACTAGTGGATCCTCAGAGGCGGTCGAGGAG (BamHI)
psdC1-com-F	GAACCCGTCTCGAGGTCGACAAACCGGGCGTGAATGAA (SalI)	Amplifies a 300-bp fragment of psdA promoter
psdC1-com-R	GTTTGTAGCTGTTCATGCACTCACATCCCTGT
psdC2-com-F	ACAGGGATGTGAGTGCATGAACAGCTACAAAC	Amplifies a 1041-bp fragment of psdC
psdC2-com-R	GCTCTAGAACTAGTGGATCCTCAGTTGTGGTTTTCAAC (BamHI)
psdD1-com-F	GAACCCGTCTCGAGGTCGACAAACCGGGCGTGAATGAA (SalI)	Amplifies a 300-bp fragment of psdA promoter
psdD1-com-R	AAACATCCTTGTTCATGCACTCACATCCCTGT
psdD2-com-F	ACAGGGATGTGAGTGCATGAACAAGGATGTTT	Amplifies a 627-bp fragment of psdD
psdD2-com-R	GCTCTAGAACTAGTGGATCCTCAGAGCTTGATCGAATG (BamHI)
psdE1-com-F	GAACCCGTCTCGAGGTCGACAAACCGGGCGTGAATGAA(SalI)	Amplifies a 300-bp fragment of psdA promoter
psdE1-com-R	GGCCAATGTGTTTCATGCACTCACATCCCTGT
psdE2-com-F	ACAGGGATGTGAGTGCATGAAACACATTGGCC	Amplifies a 1722-bp fragment of psdE
psdE2-com-R	GCTCTAGAACTAGTGGATCCTCAGGACGCCAGGCGGGC (BamHI)
psdF1-com-F	GAACCCGTCTCGAGGTCGACAAACCGGGCGTGAATGAA (SalI)	Amplifies a 300-bp fragment of psdA promoter
psdF1-com-R	TTGCTTGCTTGCTCATGCACTCACATCCCTGT
psdF2-com-F	ACAGGGATGTGAGTGCATGAGCAAGCAAGCAA	Amplifies a 690-bp fragment of psdF
psdF2-com-R	GCTCTAGAACTAGTGGATCCTCACGTGCGCACCAGCGC(BamHI)
psdG1-com-F	GAACCCGTCTCGAGGTCGACAAACCGGGCGTGAATGAA (SalI)	Amplifies a 300-bp fragment of psdA promoter
psdG1-com-R	GGTCGATCGCACTCACGCACTCACATCCCTGT
psdG2-com-F	ACAGGGATGTGAGTGCGTGAGTGCGATCGACC	Amplifies a 945-bp fragment of psdG
psdG2-com-R	GCTCTAGAACTAGTGGATCCTCAAACCTGCACCAACCA (BamHI)
rsmY-com-F	CCGGAATTCCCAGGTGCAGGCCGAGAT (EcoRI)	Amplifies a 724-bp fragment of rsmY and its own promoter
rsmY-com-R	CGGGGTACCCATCGGTGAAGGCGGGGAG (KpnI)
rsmZ-com-F	CCGGAATTCACGAAGGCCCGAACTTCC (EcoRI)	Amplifies a 736-bp fragment of rsmZ and its promoter
rsmZ-com-R	CGGGGTACCCAGGCGCCAATCTGGTTG (KpnI)
rsmYZ-com-R	GCTCTAGACATCGGTGAAGGCGGGGAG (XbaI)	Amplifies a 1460-bp fragment of rsmY and rsmZ
rsmYZ-com-F	GCTCTAGACATCGGTGAAGGCGGGGAG (XbaI)
pBS-Pseu-F	GCTCTAGAAAACCGGGCGTGAATGAAC (XbaI)	Amplifies 7231-bp of pseudoiodinine cluster and its promoter
pBS-Pseu-R	CGCGGATCCTCAAACCTGCACCAACCACTC (BamHI)
pBS-Pseu-ORF-F	CGCGGATCCATGAATGCCCAGAAACCC (BamHI)	Amplifies 6931-bp of pseudoiodinine cluster without promoter
pBS-Pseu-ORF-R	CCGGAATTCTCAAACCTGCACCAACCAC (EcoRI)
Primers used for RT-PCR and qRT-PCR
2063F	GCGGTCAGTGCCCATTTC	Amplifies a 631-bp fragment between orf2063 and orf2064
2064R	CGTTGAGGAAGATGCGGC
2064F	CTCAACACGGTCAACGGC	Amplifies a 731-bp fragment between orf2064 (psdA) and orf2065 (psdB)
2065R	GATGTGGTTCAGCTCGGG
2065F	CGCCAACTACTGCTACAACC	Amplifies a 931-bp fragment between orf2065(psdB) and orf2066 (psdC)
2066R	ATCTGCGGGGTGAAGGTGT
2066F	CTTCGGGGTGCTGGACAT	Amplifies a 631-bp fragment between orf2066 (psdC) and orf2067(psdD)
2067R	GCAGGTTGGCTTCATAGGTG
2067F	ACACCTATGAAGCCAACCTG	Amplifies a 631-bp fragment between orf2067 (psdD) and orf2068(psdE)
2068R	GACCAGACCACCGAGATAAC
2068F	AGCAGCGTGCGGCATATC	Amplifies a 631-bp fragment between orf2068 (psdE) and orf2069(psdF)
2069R	CATTGTCCAGGGCCGCAT
2069F	TCGCCTGGACCTGGTGAAC	Amplifies a 631-bp fragment between orf2069 (psdF) and orf2070 (psdG)
2070R	AGGGCAATGCCTCGACCA
2070F	CTGAGCACTTGTGACTGGGT	Amplifies a 631-bp fragment between orf2070 (psdG) and orf2071
2071R	TCAAACCGAACGGACAGC
16SrRNA-F	ATCCTGCAACACAAGTTCGC	Reference gene of P. mosselii DSM17497
16SrRNA-R	GGGTGGAGATGTTGTAGGGC
orf 2184-F	CACCTTCGCCAAGTACCGT	To detect the transcript of orf2184
orf 2184-R	TAGTGCAGGCAGTCGTTGAG
orf 2185-F	TCTACAGCGACATCCTTGGC	To detect the transcript of orf2185
orf 2185-R	GGTCGGGTAACTGAACGACT
orf 2186-F	GCAACGTCGAAGAGTACGTG	To detect the transcript of orf2186
orf 2186-R	GAAACGGGTAAAGCTGCCAC
orf 2187-F	CACACCATCGTGCCGATTTC	To detect the transcript of orf2187
orf 2187-R	AAATGCTCCTGGTCACGCTC
orf 2188-F	TCGTCAGGAATGGCGAAGAC	To detect the transcript of orf2188
orf 2188-R	TGTCATGCATGGGGATCGAC
orf 2189-F	GCCCTCGATACTTCGTTCGT	To detect the transcript of orf2189
orf 2189-R	GCCGATGTCCAGTACATGCT
orf 2190-F	TGAGCACTTGTGACTGGGTG	To detect the transcript of orf2190
orf 2190-R	GGTCGACCAATACCCGCAAG
rpoD-rtF	ACCTATGCGACCTGGTGGAT	Reference gene of P. mosselii 923
rpoD-rtR	TGCGGTTGAGCTTGTTGATC
gene3236-rtF	ATTTCCCGCTCGGACAGC	To detect the transcript level of orf3236
gene3236-rtR	CCGGCCAGCGTTACATCA
gene4946-rtF	CGTCGCGGACCTCACTGATA	To detect the transcript level of orf4946
gene4946-rtR	CGCAATGGCGTGATCTACCT
gene2069-rtF	GTGACGCCTCCACCTTCATC	To detect the transcript level of orf2069
gene2069-rtR	CAGTCCTGCATGGCCTTGTT
gene2070-rtF	ATCGACCGCCATTACCTGG	To detect the transcript level of orf2070
gene2070-rtR	CGTTGACGATCACGCAACC
gene2172-rtF	ACGGCGTTGATTTCGAGAAG	To detect the transcript level of orf2072
gene2172-rtR	TTGCTGACGCAGGAACTTGG
gene2173-rtF	CGCGGTCAATATCCTGTCG	To detect the transcript level of orf2073
gene2173-rtR	CCTGCGATGATTGGGTTGC
gene3132-rtF	GCTACGGATTCTGGGACCTG	To detect transcript level of orf3132
gene3132-rtR	TCTGGAAGCCATCCTTGAGC
gene3133-rtF	AACCCGGTGGTGGTGATTT	To detect the transcript level of orf3133
gene3133-rtR	TCGAAGTTGCCGGTGGAGT
gene3632-rtF	GACTTCCGCGACCACTTCAC	To detect the transcript level of orf3632
gene3632-rtR	AGGTACGACTTGGCCCACAG
gene3160-rtF	TCGTCGGAGTTGCACAGGA	To detect the transcript level of orf3160
gene3160-rtR	GGTGCCCAACAGCGTCAAT
gene5054-rtF	CTGCATGTCGGCCAGTTTC	To detect the transcript level of orf5054
gene5054-rtR	TCTGCCCGCTATGGCATCT
gene5053-rtF	CCCGCTGTTTATTGGTGGC	To detect the transcript level of orf5053
gene5053-rtR	CTTACCGTGGGCAATGACG
gene36-rtF	ATGCCGACGAAGCACCCTT	To detect the transcript level of orf3636
gene36-rtR	ATCGAGATCGCCTTCACCC
gene5192-rtF	CTCAAGCCCAACAGCTCGTT	To detect the transcript level of orf5192
gene5192-rtR	ACCCACATTCGGAGTCCTTC
gene4148-rtF	ATCGGCGATTCGCTCTACC	To detect the transcript level of orf4148
gene4148-rtR	GTCGCTGGCGTTGATTGC
Primers used for protein overproduction
gacA-F	GGAATTCCATATGGTGGTCGACGATCACGATCT (NdeI)	Amplifies a 621-bp fragment of gacA
gacA-R	CCGCTCGAGCAGACTTGCGTCGACCATAC (XhoI)
T7 promoter-F	TAATACGACTCACTATAGGG	Universal primer for sequencing
T7 terminator-R	AAAAACCCCTCAAGACCC
Primers used for probes synthesize
PrsmY-F	GTCGTGTAAGCCAAAGCTTACAAAAGCAGTCCTTGCACAA	To synthesize a 40 bp probe of rsmY-F
PrsmY-R	TTGTGCAAGGACTGCTTTTGTAAGCTTTGGCTTACACGAC	To synthesize a 40 bp probe of rsmY-R
PrsmZ-F	GACGAGTAAGCGAATGCTTACACGCGATGCTACGAGGGTG	To synthesize a 40 bp probe of rsmZ-F
PrsmZ-R	CACCCTCGTAGCATCGCGTGTAAGCATTCGCTTACTCGTC	To synthesize a 40 bp probe of rsmZ-R
Note: Underlined bases indicate restriction enzyme sites.
